# Supplementary material for: Copolymer nanocomposites with strong adsorption of exfoliated silicate nanosheets and high-temperature stability
Source: Royal Society of Chemistry journal article supplement (doi:10.1039/d2nj03925g), 2022-01-01
Supplement: d2nj03925g2.pdf [file d2nj03925g2.pdf]

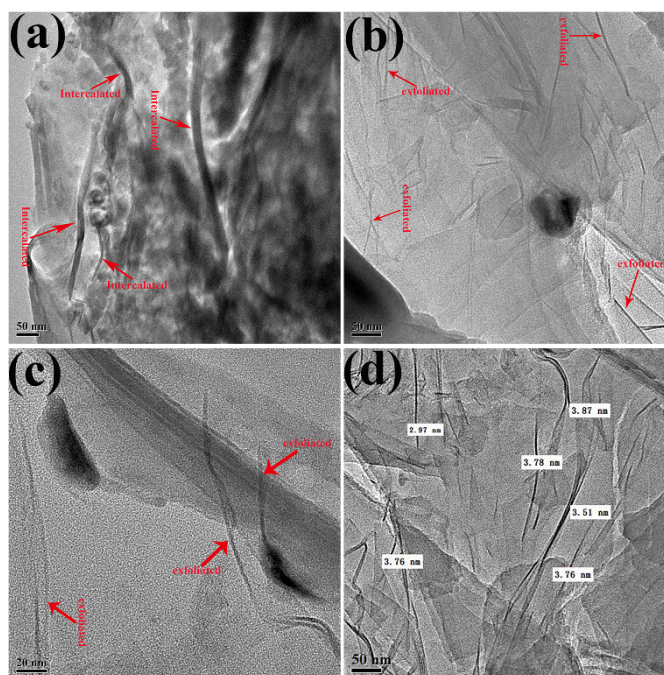

**Fig. S1** TEM images of (a) unmodified Mt (scale: 50 nm), (b) AAS/1.0 wt% I-Mt (scale: 50 nm), and (c) AAS/1.0 wt% I-Mt (scale: 20 nm); (d) thickness of the nanosheets in AAS/1.0 wt% I-Mt.
