# Supplementary figures and images for: Copolymer nanocomposites with strong adsorption of exfoliated silicate nanosheets and high-temperature stability
Source: Royal Society of Chemistry journal article supplement (doi:10.1039/d2nj03925g), 2022-01-01

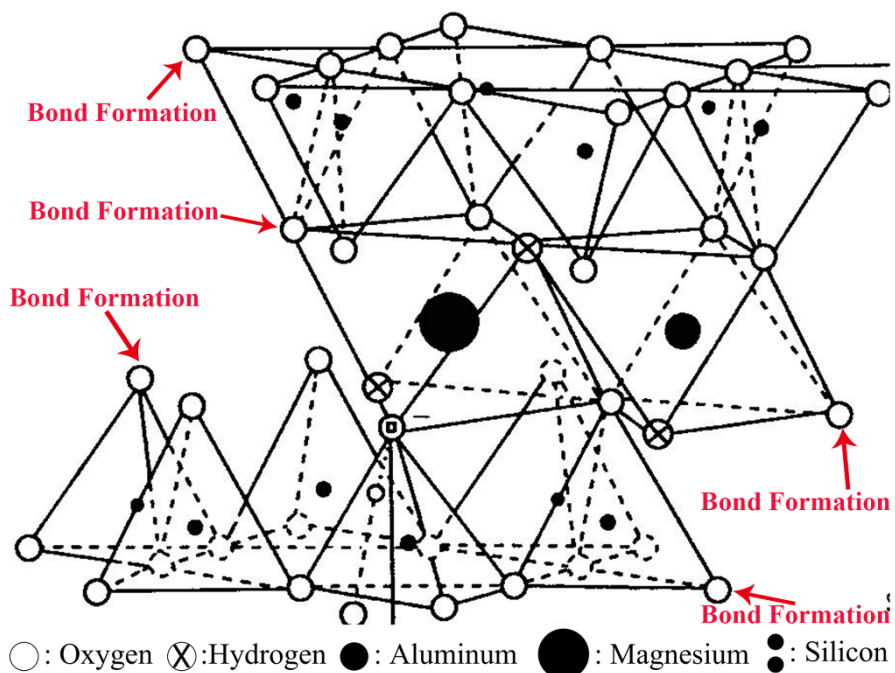

Fig. S2 Bonding sites in exfoliated Mt nanosheets.

Supplement: d2nj03925g3.pdf [file d2nj03925g3.pdf]
